# Supplementary material for: The Association of Selected GWAS Reported AD Risk Loci with CSF Biomarker Levels and Cognitive Decline in Slovenian Patients
Source: MDPI journal article supplement (doi:10.3390/ijms241612966), 2023-08-19
Supplement: s1 [file s1]

**Table S1: Genotype frequencies of selected polymorphisms.**

| Gene          | SNP       | Role           | Genotype | All subjects, n<br>= 145<br>N (%) | MAF  | pHWE  |
|---------------|-----------|----------------|----------|-----------------------------------|------|-------|
| <i>SORCS1</i> | rs1358030 | g.108123599G>A | CC       | 17 (11.7)                         | 0.34 | 0.970 |
|               |           |                | CT       | 65 (44.8)                         |      |       |
|               |           |                | TT       | 63 (43.4)                         |      |       |
|               | rs1416406 | g.109044871A>G | TT       | 15 (10.3)                         | 0.28 | 0.163 |
|               |           |                | TC       | 52 (35.9)                         |      |       |
|               |           |                | CC       | 78 (53.8)                         |      |       |
| <i>BCHE</i>   | rs1803274 | p.Ala567Thr    | CC       | 97 (66.9)                         | 0.18 | 0.709 |
|               |           |                | CT       | 44 (30.3)                         |      |       |
|               |           |                | TT       | 4 (2.8)                           |      |       |
|               | rs1799807 | p.Asp98Gly     | TT       | 139 (95.9)                        | 0.02 | 0.798 |
|               |           |                | TC       | 6 (4.1)                           |      |       |
|               |           |                | CC       | 0                                 |      |       |
| <i>TOMM40</i> | rs2075650 | g.44892362A>G  | AA       | 80 (55.2)                         | 0.26 | 0.655 |
|               |           |                | AG       | 54 (37.2)                         |      |       |
|               |           |                | GG       | 11 (7.6)                          |      |       |
|               | rs157581  | p.Phe113=      | TT       | 58 (40)                           | 0.36 | 0.717 |
|               |           |                | TC       | 69 (47.6)                         |      |       |
|               |           |                | CC       | 18 (12.4)                         |      |       |
| <i>ACE</i>    | rs1800764 | g.63473168C>T  | CC       | 29 (20)                           | 0.44 | 0.688 |
|               |           |                | CT       | 69 (47.6)                         |      |       |
|               |           |                | TT       | 47 (32.4)                         |      |       |
|               | rs4343    | p.Thr776=      | GG       | 42 (29)                           | 0.48 | 0.286 |
|               |           |                | GA       | 66 (45.5)                         |      |       |
|               |           |                | AA       | 37 (25.5)                         |      |       |
| <i>IL6R</i>   | rs2228145 | p.Asp358Ala    | AA       | 60 (41.4)                         | 0.34 | 0.284 |
|               |           |                | AC       | 71 (49)                           |      |       |
|               |           |                | CC       | 14 (9.7)                          |      |       |

**Table S2: Association of investigated polymorphisms with cerebrospinal fluid biomarkers among patients with AD.**

| SNP                 | Genotype | A $\beta$             | P                           | A $\beta_{42/40}$ ratio | P                           | Total tau             | P                                  | pTau                 | P                           |
|---------------------|----------|-----------------------|-----------------------------|-------------------------|-----------------------------|-----------------------|------------------------------------|----------------------|-----------------------------|
| SORCS1<br>rs1358030 | CC       | 604 (545-745)         | 0.504                       | 0.05 (0.04-0.0575)      | 0.210                       | 1055 (787.75-1289.75) | 0.064                              | 130 (95.75-154.5)    | 0.237                       |
|                     | CT       | 696 (582.75-773.75)   |                             | 0.06 (0.04-0.06)        |                             | 768 (541.5-953)       |                                    | 101.5 (81.75-123.5)  |                             |
|                     | TT       | 688.5 (516.25-766.75) |                             | 0.06 (0.05-0.07)        |                             | 735 (522.5-957)       |                                    | 95 (78-123.75)       |                             |
|                     | CT + TT  | 692 (538.25-769.75)   | P <sub>dom</sub> =<br>0.497 | 0.06 (0.04-0.06)        | P <sub>dom</sub> =<br>0.295 | 749 (524.25-955.5)    | P <sub>dom</sub> =<br><b>0.019</b> | 97 (81-123.75)       | P <sub>dom</sub> =<br>0.113 |
| SORCS1<br>rs1416406 | TT       | 697 (565.5-795.5)     | 0.868                       | 0.06 (0.04-0.07)        | 0.772                       | 814 (663.5-907.5)     | <b>0.013</b>                       | 101 (78-120)         | <b>0.036</b>                |
|                     | TC       | 663.5 (531.75-762.25) |                             | 0.06 (0.04-0.07)        |                             | 597.5 (492.75-783.5)  |                                    | 90 (78.5-110.25)     |                             |
|                     | CC       | 689 (534.5-772)       |                             | 0.05 (0.04-0.06)        |                             | 855 (557.5-1085.5)    |                                    | 111 (86.5-132.5)     |                             |
|                     | TC + CC  | 669 (538-769)         | P <sub>dom</sub> =<br>0.609 | 0.06 (0.04-0.06)        | P <sub>dom</sub> =<br>0.969 | 763 (525-1001)        | P <sub>dom</sub> =<br>0.640        | 97 (81-126)          | P <sub>dom</sub> =<br>0.738 |
| BCHE<br>rs1803274   | CC       | 697 (543-770)         | 0.968                       | 0.05 (0.04-0.06)        | 0.087                       | 773 (542-921)         | 0.956                              | 98 (81-122)          | 0.648                       |
|                     | CT       | 658 (539-769)         |                             | 0.06 (0.04-0.07)        |                             | 778 (496-1151)        |                                    | 101 (79-140)         |                             |
|                     | TT       | 651 (507-.)           |                             | 0.08 (0.07-.)           |                             | 735 (722-.)           |                                    | 94.5 (93-.)          |                             |
|                     | CT + TT  | 658 (538.5-777)       | P <sub>dom</sub> =<br>0.802 | 0.06 (0.04-0.07)        | P <sub>dom</sub> =<br>0.290 | 748 (499-1122.5)      | P <sub>dom</sub> =<br>0.900        | 98 (80-135.5)        | P <sub>dom</sub> =<br>0.482 |
| BCHE<br>rs1799807   | TT       | 668 (538.25-769.75)   | 0.701                       | 0.05 (0.04-0.06)        | 0.087                       | 771 (533-968.5)       | 0.893                              | 98 (81-124)          | 0.942                       |
|                     | TC       | 691.5 (607.75-786.5)  |                             | 0.065 (0.06-0.07)       |                             | 820 (407.5-1168)      |                                    | 107.5 (59.25-149.75) |                             |
|                     | TC + CC  | 691.5 (607.75-786.5)  | P <sub>dom</sub> =<br>0.701 | 0.065 (0.06-0.07)       | P <sub>dom</sub> =<br>0.087 | 820 (407.5-1168)      | P <sub>dom</sub> =<br>0.893        | 107.5 (59.25-149.75) | P <sub>dom</sub> =<br>0.942 |
| TOMM40<br>rs2075650 | AA       | 695 (540-767.5)       | 0.902                       | 0.06 (0.04-0.06)        | 0.154                       | 766 (543.75-955.5)    | 0.410                              | 95.5 (81-125.25)     | 0.449                       |
|                     | AG       | 655.5 (553.5-770.5)   |                             | 0.06 (0.05-0.07)        |                             | 749 (500.5-1004)      |                                    | 97.5 (80-124.25)     |                             |
|                     | GG       | 616.5 (498-799.75)    |                             | 0.05 (0.03-0.05)        |                             | 866 (733.25-1203.5)   |                                    | 118 (95.75-151)      |                             |
|                     | AG + GG  | 655.5 (540-772.75)    | P <sub>dom</sub> =<br>0.784 | 0.05 (0.04-0.07)        | P <sub>dom</sub> =<br>0.879 | 778 (507.5-1010)      | P <sub>dom</sub> =<br>0.993        | 101 (81.75-124.75)   | P <sub>dom</sub> =<br>0.697 |
| TOMM40<br>rs157581  | TT       | 695 (540-781.25)      | 0.967                       | 0.06 (0.04-0.06)        | 0.580                       | 741 (550.75-980.5)    | 0.405                              | 95.5 (81.75-128)     | 0.370                       |
|                     | TC       | 650.5 (544-758.25)    |                             | 0.06 (0.05-0.06)        |                             | 761.5 (523.5-912.75)  |                                    | 97.5 (78.5-120)      |                             |
|                     | CC       | 703 (519.75-789.75)   |                             | 0.05 (0.04-0.06)        |                             | 866 (664.25-1168.75)  |                                    | 118 (90.75-142.75)   |                             |
|                     | TC + CC  | 655.5 (540-766.5)     | P <sub>dom</sub> =<br>0.984 | 0.06 (0.05-0.06)        | P <sub>dom</sub> =<br>0.564 | 780 (524.25-993)      | P <sub>dom</sub> =<br>0.922        | 99 (81-123.75)       | P <sub>dom</sub> =<br>0.988 |

|                   |         |                       |                             |                      |                             |                       |                             |                     |                             |
|-------------------|---------|-----------------------|-----------------------------|----------------------|-----------------------------|-----------------------|-----------------------------|---------------------|-----------------------------|
| ACE<br>rs1800764  | CC      | 587.5 (538.25-770)    | 0.741                       | 0.05 (0.04-0.06)     | 0.997                       | 758.5 (524.25-958.25) | 0.636                       | 97.5 (82.75-124)    | 0.786                       |
|                   | CT      | 708.5 (560-785.75)    |                             | 0.06 (0.04-0.06)     |                             | 770.5 (556.5-1024.75) |                             | 99 (84-132.5)       |                             |
|                   | TT      | 652.5 (537.75-750.25) |                             | 0.06 (0.04-0.07)     |                             | 777.5 (490.5-888.5)   |                             | 99 (80-116)         |                             |
|                   | CT + TT | 696 (546.25-769.75)   | P <sub>dom</sub> =<br>0.718 | 0.06 (0.04-0.06)     | P <sub>dom</sub> =<br>0.937 | 775.5 (543.75-993)    | P <sub>dom</sub> =<br>0.652 | 99 (81-127.25)      | P <sub>dom</sub> =<br>0.899 |
| ACE<br>rs4343     | GG      | 692 (538.75-762)      | 0.545                       | 0.06 (0.0475-0.0625) | 0.535                       | 735 (524.25-873.5)    | 0.395                       | 97.5 (81-124)       | 0.880                       |
|                   | GA      | 692.5 (564-785.75)    |                             | 0.06 (0.04-0.06)     |                             | 782.5 (546.5-1052.75) |                             | 97.5 (83.25-126.5)  |                             |
|                   | AA      | 598.5 (516-738)       |                             | 0.045 (0.03-0.0675)  |                             | 793.5 (484.25-992.5)  |                             | 103 (81-134.75)     |                             |
|                   | GA + AA | 668 (539.75-771.25)   | P <sub>dom</sub> =<br>0.878 | 0.055 (0.04-0.06)    | P <sub>dom</sub> =<br>0.533 | 782.5 (537-1014.75)   | P <sub>dom</sub> =<br>0.216 | 99.5 (81-128.75)    | P <sub>dom</sub> =<br>0.618 |
| ACE2<br>rs1978124 | TT      | 713.5 (545-799.75)    | 0.201                       | 0.06 (0.04-0.07)     | 0.124                       | 733.5 (543.75-859.25) | 0.106                       | 96.5 (81-121.25)    | 0.217                       |
|                   | TC      | 636 (520-744.5)       |                             | 0.05 (0.0375-0.06)   |                             | 872.5 (563-1168.75)   |                             | 116.5 (83.25-151)   |                             |
|                   | CC      | 643 (562-750)         |                             | 0.055 (0.0475-0.07)  |                             | 747.5 (511.75-973)    |                             | 99 (76.75-117.5)    |                             |
|                   | TC + CC | 643 (532-745.25)      | P <sub>dom</sub> =<br>0.088 | 0.05 (0.04-0.06)     | P <sub>dom</sub> =<br>0.208 | 810 (526.5-1034.25)   | P <sub>dom</sub> =<br>0.139 | 101.5 (81-127.5)    | P <sub>dom</sub> =<br>0.321 |
| ACE2<br>rs2285666 | CC      | 669 (518-769.5)       | 0.433                       | 0.05 (0.04-0.06)     | 0.374                       | 778 (545.5-993)       | 0.859                       | 98 (81-124.5)       | 0.809                       |
|                   | CT      | 614 (575-775)         |                             | 0.06 (0.04-0.06)     |                             | 722 (515-967)         |                             | 93 (77-137)         |                             |
|                   | TT      | 708 (652.75-832.5)    |                             | 0.07 (0.05-0.07)     |                             | 685.5 (495-1021.5)    |                             | 104 (71-113)        |                             |
|                   | CT + TT | 695 (585-775)         | P <sub>dom</sub> =<br>0.345 | 0.06 (0.04-0.06)     | P <sub>dom</sub> =<br>0.508 | 722 (515-969)         | P <sub>dom</sub> =<br>0.646 | 100 (77-128)        | P <sub>dom</sub> =<br>0.525 |
| IL6R<br>rs2228145 | AA      | 595 (513-774.5)       | 0.120                       | 0.05 (0.04-0.065)    | 0.900                       | 773 (552.5-1085.5)    | 0.446                       | 102 (82.5-129.5)    | 0.542                       |
|                   | AC      | 711 (581-788)         |                             | 0.06 (0.04-0.06)     |                             | 748 (522-911)         |                             | 97 (81-123)         |                             |
|                   | CC      | 592 (495-685.75)      |                             | 0.06 (0.035-0.0675)  |                             | 838.5 (541.5-1147)    |                             | 99.5 (73.75-145.25) |                             |
|                   | AC + CC | 695 (570-760)         | P <sub>dom</sub> =<br>0.400 | 0.06 (0.04-0.06)     | P <sub>dom</sub> =<br>0.646 | 763 (524-921)         | P <sub>dom</sub> =<br>0.425 | 97 (81-124)         | P <sub>dom</sub> =<br>0.269 |

**Table S3: Association of investigated polymorphisms with cognitive test scores among all patients.**

| SNP                        | Genotype | MMSE               | P                               |
|----------------------------|----------|--------------------|---------------------------------|
| <i>SORCS1</i><br>rs1358030 | CC       | 26.5 (21-27.25)    | 0.425                           |
|                            | CT       | 26 (24-27)         |                                 |
|                            | TT       | 25.5 (21.75-26.75) |                                 |
|                            | CT + TT  | 26 (24-27)         | P <sub>dom</sub> =0.643         |
| <i>SORCS1</i><br>rs1416406 | TT       | 23 (20.25-26)      | 0.898                           |
|                            | TC       | 26 (23.75-26.25)   |                                 |
|                            | CC       | 26 (25-27)         |                                 |
|                            | TC + CC  | 26 (24-27)         | P <sub>dom</sub> =0.748         |
| <i>BCHE</i><br>rs1803274   | CC       | 26 (24-27)         | 0.056                           |
|                            | CT       | 24 (21-26)         |                                 |
|                            | TT       | 21.5 (16-.)        |                                 |
|                            | CT + TT  | 24 (21-26)         | P <sub>dom</sub> = <b>0.029</b> |
| <i>TOMM40</i><br>rs2075650 | AA       | 26 (24-27)         | 0.484                           |
|                            | AG       | 26 (22-27)         |                                 |
|                            | AG + GG  | 26 (22.5-27)       | P <sub>dom</sub> =0.608         |
| <i>TOMM40</i><br>rs157581  | TT       | 26 (24.75-27)      | 0.318                           |
|                            | TC       | 26 (21.5-27)       |                                 |
|                            | CC       | 26 (16-.)          |                                 |
|                            | TC + CC  | 26 (21-27)         | P <sub>dom</sub> =0.260         |
| <i>ACE</i><br>rs1800764    | CC       | 24.5 (21-26)       | 0.197                           |
|                            | CT       | 26 (24-27.75)      |                                 |
|                            | TT       | 26 (24.5-27)       |                                 |
|                            | CT + TT  | 26 (24-27)         | P <sub>dom</sub> =0.077         |
| <i>ACE</i><br>rs4343       | GG       | 26 (23-26)         | 0.463                           |
|                            | GA       | 25 (23-27.5)       |                                 |
|                            | AA       | 26 (25-27)         |                                 |
|                            | GA + AA  | 26 (23.75-27)      | P <sub>dom</sub> =0.729         |
| <i>ACE2</i><br>rs1978124   | TT       | 26 (24-27)         | 0.785                           |
|                            | TC       | 26 (22.25-28.25)   |                                 |

|                   |         |                   |                         |
|-------------------|---------|-------------------|-------------------------|
|                   | CC      | 26 (22.5-26.5)    |                         |
|                   | TC + CC | 26 (23-27)        | P <sub>dom</sub> =0.983 |
| ACE2<br>rs2285666 | CC      | 26 (24-26.75)     | 0.495                   |
|                   | CT      | 26 (23-27.75)     |                         |
|                   | TT      | 26 (22.5-27)      |                         |
|                   | CT + TT | 26 (23-27)        | P <sub>dom</sub> =0.624 |
| IL6R<br>rs2228145 | AA      | 26 (24-27)        | 0.841                   |
|                   | AC      | 25.5 (21-27)      |                         |
|                   | CC      | 25 (23.25-26)     |                         |
|                   | AC + CC | 25.5 (22.5-26.25) | P <sub>dom</sub> =0.591 |
